# Supplementary material
Source: PubMed Central journal article supplement (PMC5607023)
Supplement: NIHMS845469-supplement-1.pdf [file NIHMS845469-supplement-1.pdf]

**Supplemental Table 1: Demographics, wound characteristics, and visual outcomes of zone 1 (n=241) salvageable adult open globe injuries from 2004-2014.**

|                                                                                                | <b>Regional Anesthesia</b>         | <b>General Anesthesia</b>             |
|------------------------------------------------------------------------------------------------|------------------------------------|---------------------------------------|
| Number of patients                                                                             | 213/241 (88%)                      | 28/241 (12%)                          |
| Mechanism of injury                                                                            |                                    |                                       |
| • Type 1 - Rupture                                                                             | 91/210 (43%)                       | 19/28 (68%)                           |
| • Type 2 - Laceration                                                                          | 77/210 (37%)                       | 4/28 (14%)                            |
| • Type 3 - IOFB                                                                                | 36/210 (17%)                       | 3/28 (11%)                            |
| • Type 4 - Perforation                                                                         | 0/210 (0%)                         | 1/28 (4%)                             |
| • Type 5 - Mixed                                                                               | 6/210 (3%)                         | 1/28 (4%)                             |
| Wound length in millimeters                                                                    | 6.6 ± 5.2 (n/N=100/213)            | 10.0 ± 6.4 (n/N=16/28)<br>(p=0.02)*   |
| Procedure time in minutes                                                                      | 52.8 ± 32.1 (n/N=212/213)          | 81.2 ± 50.3 (n/N=28/28)<br>(p=0.007)* |
| Mean Final visual acuity (N=163)**<br>(Information available for 163 patients with zone 1 OGI) |                                    |                                       |
| • ≥ 20/400 (n/N=117/163)                                                                       | 110/117                            | 7/117                                 |
| • < 20/400 (n/N=46/163)                                                                        | 36/46                              | 10/46                                 |
| Mean Presenting visual acuity (LogMAR)<br>Snellen equivalent                                   | 1.8 ± 1.0 (n/N=182/213)<br>20/1200 | 2.5 ± 0.7 (n/N=26/28)<br>HM           |
| Mean Final visual acuity (LogMAR)<br>Snellen equivalent                                        | 1.0 ± 1.1 (n/N=156/213)<br>20/200  | 1.8 ± 1.1 (n/N=19/28)<br>20/1200      |

CF- counting fingers, GA-general anesthesia, HM-hand motions, LP-light perception, NLP-no light perception, RA-MAC-regional anesthesia with monitored anesthesia care.

\*p-values were obtained by comparison of RA-MAC group versus GA group.

\*\*Although zone 1 open globe injury group included 241 patients, visual acuity at final follow-up was documented for 163 patients. Visual acuities recorded as CF, HM, LP, and NLP were converted to LogMAR values of 2, 2.3, 3 and 3.2 for the purposes of statistical analysis.
