# Supplementary material
Source: PubMed Central journal article supplement (PMC5607023)
Supplement: NIHMS845469-supplement-2.pdf [file NIHMS845469-supplement-2.pdf]

**Supplemental Table 2: Demographics, wound characteristics, and visual outcomes of zone 2 (n=135) salvageable adult open globe injuries from 2004-2014.**

|                                                                                              | <b>Regional Anesthesia</b>       | <b>General Anesthesia</b>             |
|----------------------------------------------------------------------------------------------|----------------------------------|---------------------------------------|
| Number of patients                                                                           | 104/135 (77%)                    | 31/135 (23%)                          |
| Mechanism of injury                                                                          |                                  |                                       |
| • Type 1 - Rupture                                                                           | 60/104 (58%)                     | 17/30 (57%)                           |
| • Type 2 - Laceration                                                                        | 28/104 (27%)                     | 9/30 (30%)                            |
| • Type 3 - IOFB                                                                              | 11/104 (11%)                     | 4/30 (13%)                            |
| • Type 4 - Perforation                                                                       | 1/104 (1%)                       | 0/30 (0%)                             |
| • Type 5 - Mixed                                                                             | 4/104 (4%)                       | 0/30 (0%)                             |
| Wound length in millimeters                                                                  | 6.1 ± 4.3 (n/N=39/104)           | 9.2 ± 3.5 (n/N=13/31)<br>(p=0.02)*    |
| Procedure time in minutes                                                                    | 64.3 ± 31.0 (n/N=104/104)        | 93.0 ± 49.3 (n/N=31/31)<br>(p=0.004)* |
| Mean Final visual acuity (N=85)**<br>(Information available for 85 patients with zone 2 OGI) |                                  |                                       |
| • ≥ 20/400 (n/N=47/85)                                                                       | 39/47                            | 8/47                                  |
| • < 20/400 (n/N=38/85)                                                                       | 31/38                            | 7/38                                  |
| Mean Presenting visual acuity (LogMAR)<br>Snellen equivalent                                 | 2.1 ± 1.1 (n/N=95/104)<br>CF     | 2.7 ± 0.8 (n/N=25/31)<br>HM           |
| Mean Final visual acuity (LogMAR)<br>Snellen equivalent                                      | 1.4 ± 1.3 (n/N=79/104)<br>20/500 | 1.6 ± 1.1 (n/N=20/31)<br>20/800       |

CF- counting fingers, GA-general anesthesia, HM-hand motions, LP-light perception, NLP-no light perception, RA-MAC-regional anesthesia with monitored anesthesia care.

\*p-values were obtained by comparison of RA-MAC group versus GA group.

\*\*Although zone 2 open globe injury group included 135 patients, visual acuity at final follow-up was documented for 85 patients. Visual acuities recorded as CF, HM, LP, and NLP were converted to LogMAR values of 2, 2.3, 3 and 3.2 for the purposes of statistical analysis.
