# Supplementary material
Source: PubMed Central journal article supplement (PMC5607023)
Supplement: NIHMS845469-supplement-3.pdf [file NIHMS845469-supplement-3.pdf]

**Supplemental Table 3: Demographics, wound characteristics, and visual outcomes of zone 3 (n=72) salvageable adult open globe injuries 2004-2014.**

|                                                                                              | <b>Regional Anesthesia</b>  | <b>General Anesthesia</b>              |
|----------------------------------------------------------------------------------------------|-----------------------------|----------------------------------------|
| Number of patients                                                                           | 34/72 (47%)                 | 38/72 (53%)                            |
| Mechanism of injury                                                                          |                             |                                        |
| • Type 1 - Rupture                                                                           | 18/32 (56%)                 | 21/37 (57%)                            |
| • Type 2 - Laceration                                                                        | 8/32 (25%)                  | 9/37 (24%)                             |
| • Type 3 - IOFB                                                                              | 4/32 (13%)                  | 5/37 (13%)                             |
| • Type 4 - Perforation                                                                       | 1/32 (3%)                   | 1/37 (3%)                              |
| • Type 5 - Mixed                                                                             | 1/32 (3%)                   | 1/37 (3%)                              |
| Length of Wound in millimeters                                                               | 12.8 ± 8.7 (n/N=12/34)      | 16.8 ± 6.7 (n/N=13/38)<br>(p=0.21)*    |
| Procedure time in minutes                                                                    | 79.0 ± 32.3 (n/N=34/34)     | 105.5 ± 63.6 (n/N=38/38)<br>(p=0.028)* |
| Mean Final visual acuity (N=42)**<br>(Information available for 42 patients with zone 3 OGI) |                             |                                        |
| • ≥ 20/400 (n/N=9/42)                                                                        | 6/9                         | 3/9                                    |
| • < 20/400 (n/N=33/42)                                                                       | 17/33                       | 16/33                                  |
| Mean Presenting visual acuity (LogMAR)<br>Snellen equivalent                                 | 2.4 ± 0.9 (n/N=27/34)<br>HM | 2.9 ± 0.6 (n/N=34/38)<br>LP            |
| Mean Final visual acuity (LogMAR)<br>Snellen equivalent                                      | 2.2 ± 1.0 (n/N=24/34)<br>HM | 2.6 ± 1.1 (n/N=24/38)<br>HM            |

CF- counting fingers, GA-general anesthesia, HM-hand motions, LP-light perception, NLP-no light perception, RA-MAC-regional anesthesia with monitored anesthesia care.

\*p-values were obtained by comparison of RA-MAC group versus GA group.

\*\*Although zone 3 open globe injury group included 72 patients, visual acuity at final follow-up was documented for 42 patients. Visual acuities recorded as CF, HM, LP, and NLP were converted to LogMAR values of 2, 2.3, 3 and 3.2 for the purposes of statistical analysis.
